# Supplementary material for: miR-140-5p in Small Extracellular Vesicles From Human Papilla Cells Stimulates Hair Growth by Promoting Proliferation of Outer Root Sheath and Hair Matrix Cells
Source: Front Cell Dev Biol. 2020 Dec 14;8:593638. doi: 10.3389/fcell.2020.593638 (PMC7793747; doi:10.3389/fcell.2020.593638)
Supplement: Supplementary file 4 [file Table_4.XLS]

## Sheet: out.bar_Gradient
Table S5. KEGG pathway enrichment results
ID	Num	Qvalue	per	ratio
Pathways in cancer	45	6.63701e-05	4.221	0.268
TGF-beta signaling pathway	32	0.000883629	2.782	0.274
Focal adhesion	39	0.000988111	3.659	0.248
ECM-receptor interaction	48	0.00131389	4.503	0.226
Signaling pathways regulating pluripotency of stem cells	39	0.00135034	2.627	0.277
Choline metabolism in cancer	34	0.00213027	1.032	0.458
Calcium signaling pathway	37	0.00314859	3.471	0.234
Hepatitis B	51	0.00341243	2.439	0.265
Thyroid hormone signaling pathway	36	0.00341243	1.689	0.316
PI3K-Akt signaling pathway	82	0.00382512	3.752	0.223
Other glycan degradation	11	0.00495983	1.032	0.407
Aldosterone synthesis and secretion	27	0.00495983	2.533	0.252
Signaling pathways regulating pluripotency of stem cells	34	0.00664534	3.189	0.227
Gastric acid secretion	21	0.00664534	1.97	0.273
Rap1 signaling pathway	44	0.00664534	4.128	0.209
Lysosome	32	0.00664534	3.002	0.23
Basal cell carcinoma	18	0.0122923	1.689	0.277
Long-term depression	17	0.0122923	1.595	0.283
Cushing syndrome	36	0.0122923	3.377	0.213
cAMP signaling pathway	42	0.014325	3.94	0.202
Salivary secretion	24	0.0146257	2.251	0.24
Pancreatic secretion	24	0.0181483	2.251	0.235
Human papillomavirus infection	73	0.0181483	6.848	0.175
Circadian entrainment	23	0.0255381	2.158	0.232
Melanogenesis	24	0.0255381	2.251	0.229
Colorectal cancer	21	0.0260572	1.97	0.239
Amoebiasis	24	0.0272492	2.251	0.226
Insulin secretion	21	0.0323359	1.97	0.233
GnRH signaling pathway	22	0.0323359	2.064	0.229
Cholinergic synapse	26	0.0353934	2.439	0.215
Other types of O-glycan biosynthesis	8	0.0353934	0.75	0.364
Glioma	18	0.0402662	1.689	0.24
Glycosaminoglycan biosynthesis - keratan sulfate	6	0.0418894	0.563	0.429
Vascular smooth muscle contraction	26	0.0494543	2.439	0.208
